# Supplementary material for: Effects of Multi-Task Mode on Cognition and Lower Limb Function in Frail Older Adults: A Systematic Search and Review
Source: MDPI journal article supplement (doi:10.3390/healthcare11233012), 2023-11-21
Supplement: s1 [file s1]

# Supplementary File S1. Search strategy for PubMed

| No. | Search terms                                                                                             |
|-----|----------------------------------------------------------------------------------------------------------|
| #1  | dual-task [MeSH Terms]                                                                                   |
| #2  | multi-task [MeSH Terms]                                                                                  |
| #3  | dual-task [Title/Abstract]                                                                               |
| #4  | multi-task [Title/Abstract]                                                                              |
| #5  | #1 OR #2 OR #3 OR #4                                                                                     |
| #6  | limb function [MeSH Terms]                                                                               |
| #7  | muscle function [MeSH Terms]                                                                             |
| #8  | motor function [MeSH Terms]                                                                              |
| #9  | exercise function [MeSH Terms]                                                                           |
| #10 | balance [MeSH Terms]                                                                                     |
| #11 | postural control [MeSH Terms]                                                                            |
| #12 | balance control [MeSH Terms]                                                                             |
| #13 | physical performance [MeSH Terms]                                                                        |
| #14 | limb function [Title/Abstract]                                                                           |
| #15 | muscle function [Title/Abstract]                                                                         |
| #16 | motor function [Title/Abstract]                                                                          |
| #17 | exercise Function [Title/Abstract]                                                                       |
| #18 | balance [Title/Abstract]                                                                                 |
| #19 | postural control [Title/Abstract]                                                                        |
| #20 | balance control [Title/Abstract]                                                                         |
| #21 | physical performance [Title/Abstract]                                                                    |
| #22 | #6 OR #7 OR #8 OR #9 OR #10 #11 OR #12 OR #13 OR #14 OR #15 OR #16<br>OR #17 OR #18 OR #19 OR #20 OR #21 |

|     |                                        |
|-----|----------------------------------------|
| #23 | cognition [MeSH Terms]                 |
| #24 | cognitive function [MeSH Terms]        |
| #25 | cognition [Title/Abstract]             |
| #26 | cognitive function [Title/Abstract]    |
| #27 | #23 OR #24 OR #25 OR #26               |
| #28 | frail elderly [MeSH Terms]             |
| #29 | frail older adults [MeSH Terms]        |
| #30 | sarcopenia [MeSH Terms]                |
| #31 | frail elderly [Title/Abstract]         |
| #32 | frail older adults [Title/Abstract]    |
| #33 | sarcopenia [Title/Abstract]            |
| #34 | #28 OR #29 OR #30 OR #31 OR #32 OR #33 |

The search strategy will be modified as required for other electronic databases.
